# Supplementary material for: Cross-sectional telephone surveys as a tool to study epidemiological factors and monitor seasonal influenza activity in Malta
Source: Springer Nature journal article supplement (doi:10.1186/s12889-021-11862-x), 2021-10-09
Supplement: MOESM1 [file 19743030]

# Under reporting Seasonal Flu Survey (English Version)

Gender \_\_\_\_\_ Locality \_\_\_\_\_ Age \_\_\_\_\_ Married \_\_\_\_\_

Status: Employee  Student  Housewife  Unemployed  Pensioner

What is your job? \_\_\_\_\_ Level of Education reached \_\_\_\_\_

Number of individuals at your household (including you): \_\_\_\_\_ What is their age? \_\_\_\_\_

1. What is your main means of transport?

Walking \_\_\_ Bike \_\_\_ Motorbike \_\_\_ Car \_\_\_ Public transport \_\_\_ Other \_\_\_

2. Did you receive a flu vaccine this winter/autumn season? (2014-2015)

Yes \_\_\_ No \_\_\_ I don't know \_\_\_

3. If 'No', why? \_\_\_\_\_

4. How many times did you visit your GP (doctor) during this past year? \_\_\_\_\_

5. Do you take regular medication for any medical conditions such as asthma, diabetes, heart disorders, kidney disorder or other? Yes \_\_\_ No \_\_\_ I don't know \_\_\_

6. Do you smoke? Yes \_\_\_ No \_\_\_

7. If 'Yes', how many cigarettes per day? \_\_\_\_\_

8. Have you had any of the following symptoms during the past year?

Fever \_\_\_ runny or blocked nose \_\_\_ Sneezing \_\_\_ Sore throat \_\_\_ Cough \_\_\_

Shortness of breath \_\_\_ Headache \_\_\_ Muscle/joint pain \_\_\_ Chest pain \_\_\_

Feeling tired or exhausted \_\_\_ Loss of appetite \_\_\_ Watery eyes \_\_\_ Nausea \_\_\_

Vomiting \_\_\_ Diarrhoea \_\_\_ Stomach ache \_\_\_ Other symptoms \_\_\_ Nothing \_\_\_

9. When did your symptoms appear for the above during the past year? \_\_\_\_\_

10. Were you restricted to staying at home? Yes \_\_\_ No \_\_\_ I don't know \_\_\_

11. Approximately, in days, how long was the duration for the above symptoms? \_\_\_\_\_

12. Since 'August 2014' did you have the seasonal influenza? Yes \_\_\_ No \_\_\_ I don't know \_\_\_

13. If 'Yes', when did you have the seasonal influenza? \_\_\_\_\_

14. Approximately, in days, how long was the duration of influence? \_\_\_\_\_

15. What were the symptoms? \_\_\_\_\_

16. Did you have high temperature? Yes \_\_\_ No \_\_\_ I don't know \_\_\_

17. Because of your seasonal influenza fever, did you visit a doctor?

Yes \_\_\_ No \_\_\_ I don't know \_\_\_

18. Did you take any medication due to this influenza? Yes \_\_\_ No \_\_\_ I don't know \_\_\_

19. Were you hospitalized due to your influenza? Yes \_\_\_ No \_\_\_

20. If 'Yes' for how many nights? \_\_\_\_\_

21. Did any of your household members had the seasonal influenza?

Yes \_\_\_ No \_\_\_ I don't know \_\_\_

22. If 'Yes', how many members? \_\_\_\_\_

23. And what is their age? \_\_\_\_\_
